# Supplementary material for: Glucose directs amyloid-beta into membrane-active oligomers
Source: Royal Society of Chemistry journal article supplement (doi:10.1039/c7cp02849k), 2017-01-01
Supplement: c7cp02849k1.pdf [file c7cp02849k1.pdf]

## **Glucose Directs Amyloid-beta Into Membrane-Active Oligomers**

Niraja Kedia<sup>a</sup> Michael Almisry<sup>a</sup>, and Jan Bieschke<sup>a\*</sup>

Supplementary figures S1-S7

Supplementary Figure S1

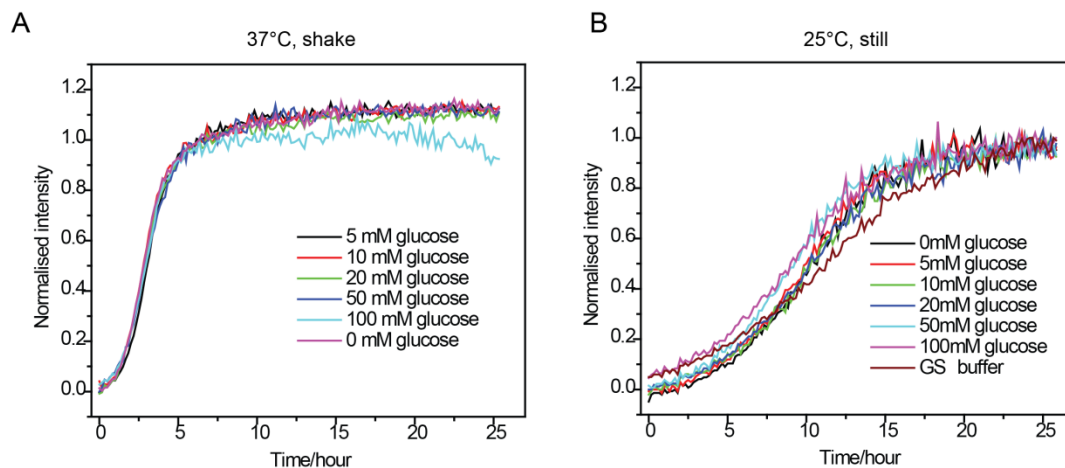

(A) Aggregation kinetics of 5  $\mu$ M freshly filtered A $\beta$ -42 in PBSN buffer containing different concentrations of glucose (0 to 100 mM) at 37°C temperature. Intermittent agitation (5s every 10 min) was used for this assay. (B) Aggregation kinetics of 5  $\mu$ M freshly filtered A $\beta$ -42 in PBSN buffer containing different concentration of glucose (0 to 100 mM) or GS-buffer at 25°C temperature. Samples were measured without agitation. Both kinetics were monitored by measuring fluorescence intensity of the ThT dye (20  $\mu$ M).

## Supplementary Figure S2

A

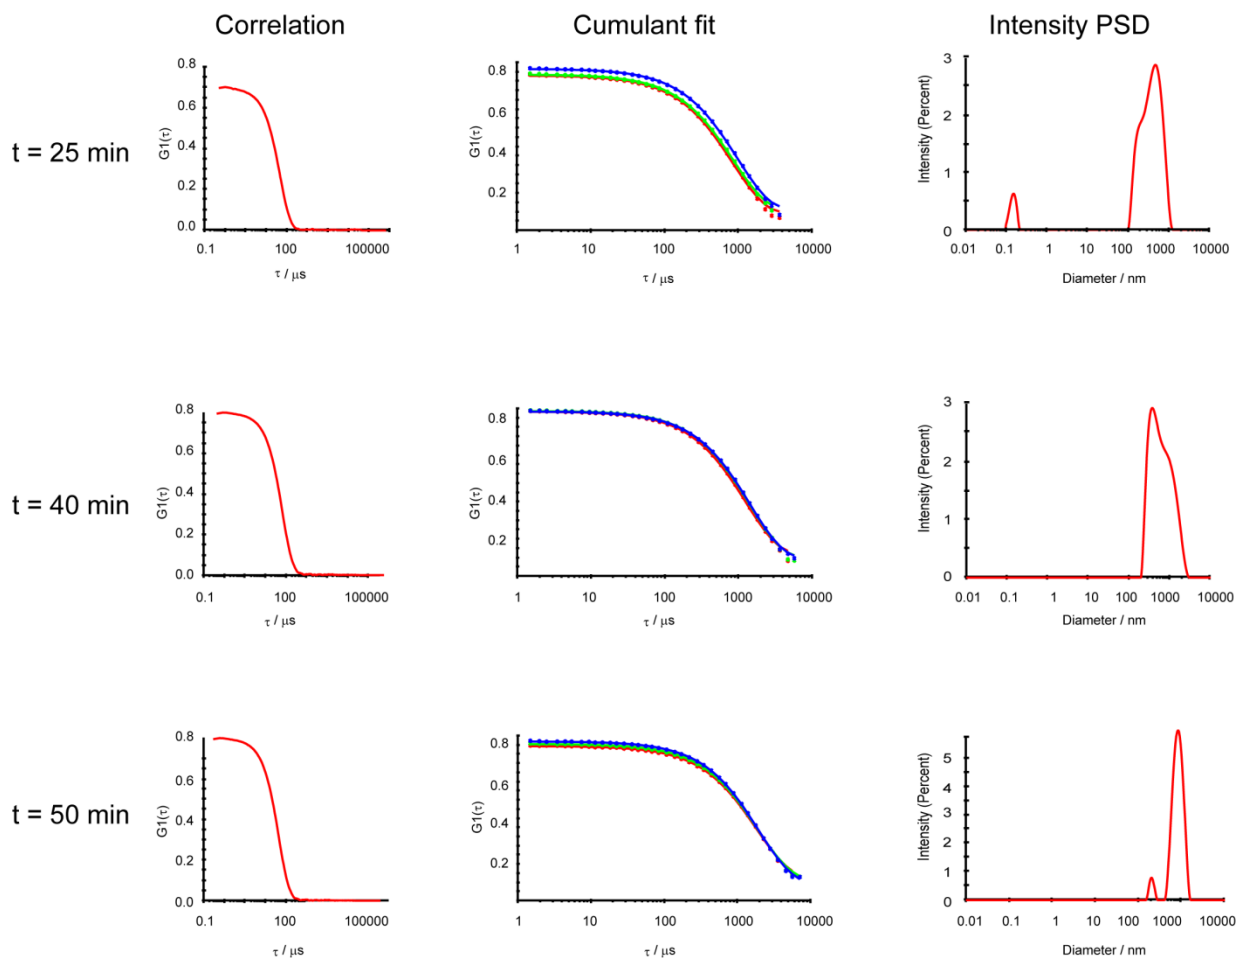

B

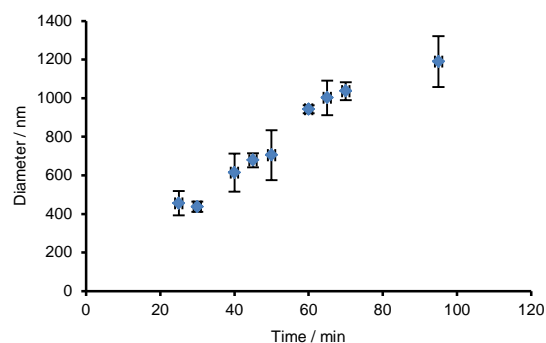

A) Dynamic light scattering autocorrelation curves, cumulant analysis, intensity particle size distribution of  $\text{A}\beta$ -42 incubated in PBSN containing 10 mM glucose buffer for 25 min, 40 min and 50 min. B) Average particle diameters from intensity distribution of  $\text{A}\beta$ -42 oligomers

in PBSN containing 10 mM glucose derived from triplicate measurements, mean  $\pm$  SD. Correlation analysis found fairly homogenous A $\beta$ -42 particles in presence of glucose, whose size increased with incubation time.

Supplementary Figure S5

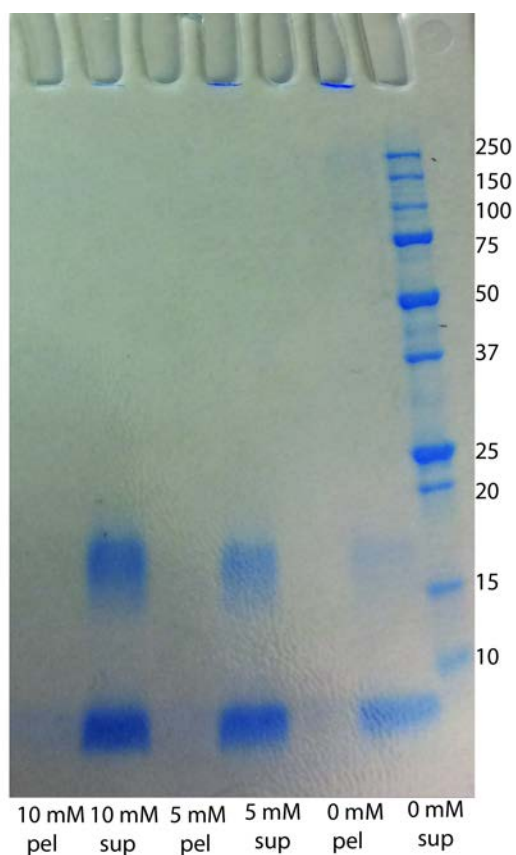

Quantification of soluble A $\beta$ -42 by ultracentrifugation. 60  $\mu$ M A $\beta$ -42 was incubated in PBSN (K-phosphate 8 mM, pH 6.8; NaCl 150 mM) containing different concentration of glucose (0 mM, 5 mM and 10 mM) for 1 h. Soluble and insoluble forms of the peptides were separated by ultracentrifugation at 70,000 rpm (200,000  $\times$  g) for 20 minutes at 4°C. After ultracentrifugation supernatants were collected and pellets were dissolved by 10 min sonication in the same volume of the same buffer as the supernatant. 2% SDS was added and supernatant and pellet fractions were boiled for 10 min. Then, samples were separated by SDS-PAGE and visualized by Coomassie brilliant blue staining. All A $\beta$ -42 was found in the supernatant fractions in the form of monomers and SDS-stable trimers.

Supplementary Figure S4

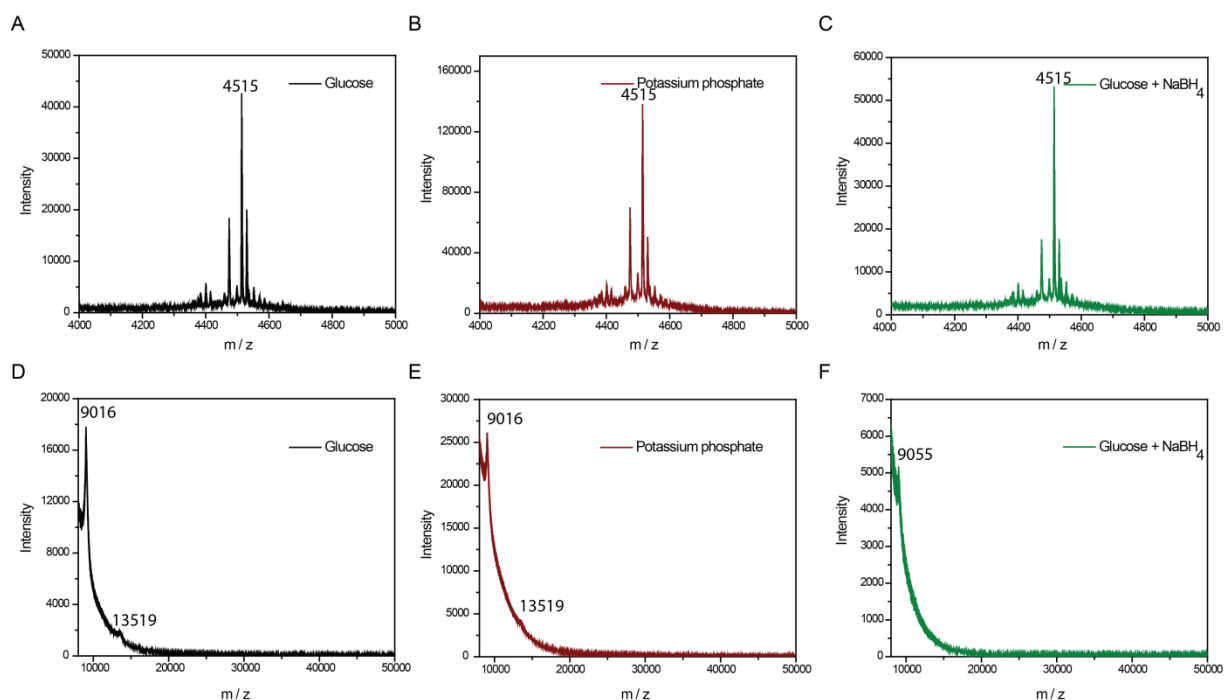

MALDI mass spectrometry analysis of 5  $\mu$ M A $\beta$ -42 incubated for 60 minutes with PBSN buffer containing 10 mM glucose (A, D), PBSN buffer (B,E) or PBSN buffer containing 10 mM glucose in which the sample was reduced by NaBH<sub>4</sub> (2 mM) added after incubation to stabilize potential Schiff base adducts (C,F). Plots A-C analyze intensities at m/z from 4000 to 5000, D-F from 8000 to 50000. In all cases m/z of main peaks represent unmodified A $\beta$ 42 monomer (4515), dimer (9016), and trimer (13,519). No peaks were found that corresponded to a Schiff base adduct of glucose (+ 162 m/z).

Supplementary Figure S5

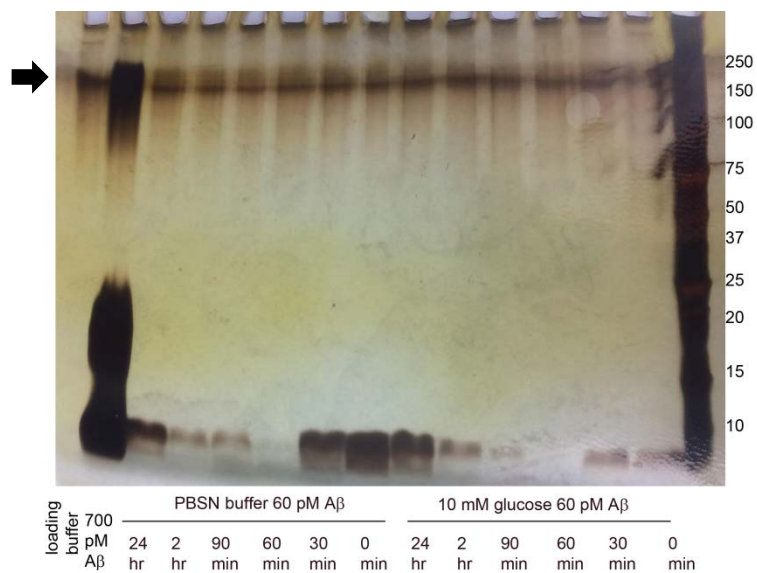

5  $\mu$ M A $\beta$ -42 (60 pmol) incubated with PBSN buffer or PBSN buffer containing 10 mM glucose for 0-24h was run through SDS PAGE gel and visualized by silver staining. Monomeric A $\beta$ -42 (100  $\mu$ M, 700 pmol) in NaOH and loading buffer were run as control samples. We found no evidence of covalent crosslinking of A $\beta$ -42 monomers via Maillard reaction. The arrow indicates an unspecific staining band also present in the buffer control sample. Note that monomeric A $\beta$ -42 (700 pmol) was strongly overstained, revealing trace amounts of oligomers.

## Supplementary Figure S6

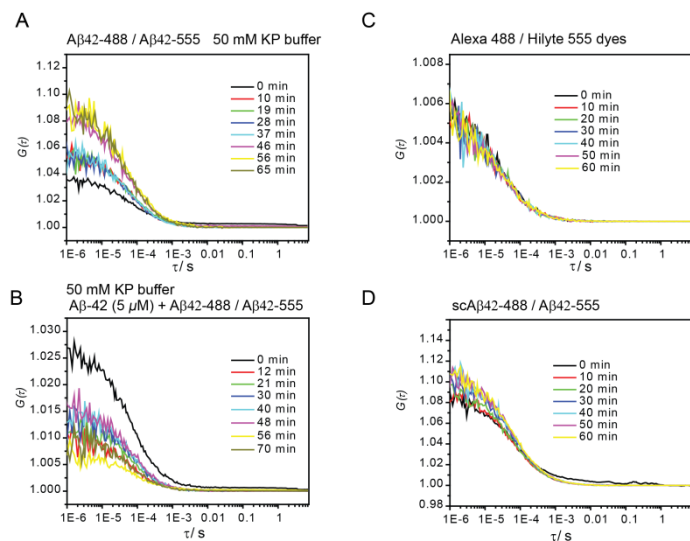

Fluorescence cross-correlation curve collected at different time points for (A) A $\beta$ 42-Hilyte 488 (50 nM) and A $\beta$ 42-Hilyte 555 (40 nM) in 50 mM KP buffer, pH 6.8; (B) 5  $\mu$  A $\beta$ -42 with A $\beta$ 42-488 (50 nM) and A $\beta$ 42-555 (40 nM) in 50 mM KP buffer, pH 6.8; (C) Free Hilyte 555 dye and Alexa 488 dye in GS buffer; (D) scrambled A $\beta$ 42-488 (16 nM) and A $\beta$ 42-555 (10 nM) in GS buffer.

Supplementary Figure S7

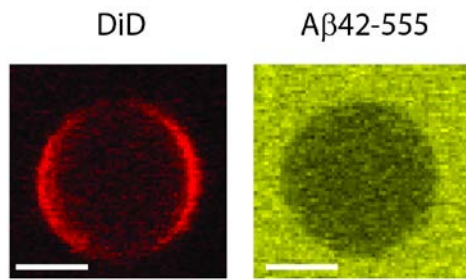

Confocal microscopy images of DiD labeled DOPC GUV and of a GUV in the presence of A $\beta$ 42-Hilyte 555 (50 nM) + A $\beta$ -42 (5  $\mu$ M).
